# Supplementary material for: Synergistic breast tumor cell killing achieved by intracellular co-delivery of doxorubicin and disulfiramviacore–shell–corona nanoparticles
Source: Royal Society of Chemistry journal article supplement (doi:10.1039/c8bm00271a), 2018-01-01
Supplement: c8bm00271a1.pdf [file c8bm00271a1.pdf]

## Supplementary Information

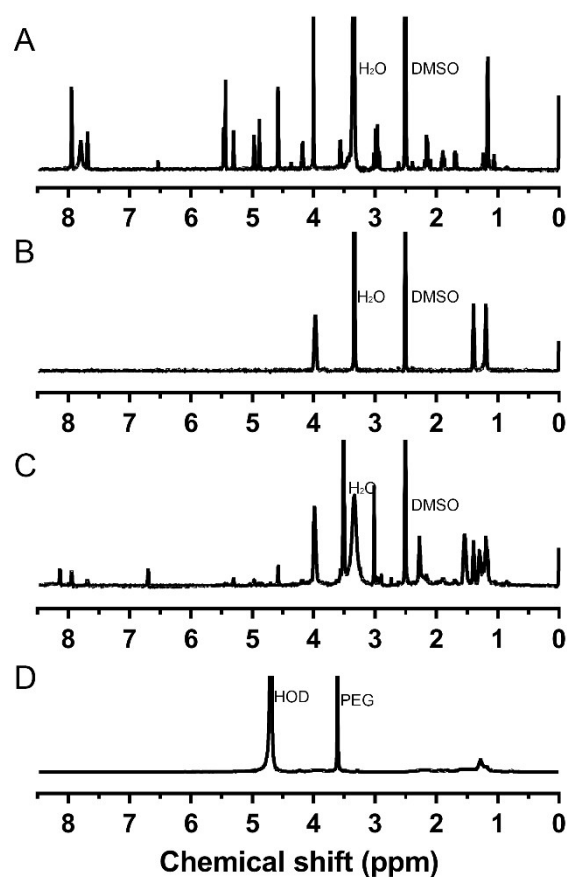

Fig.S1 <sup>1</sup>H NMR spectra of DOX (A), DSF (B), DOX, DSF and PCL-PGlu-mPEG (C) in DMSO-d<sub>6</sub>, and Co-NPs-4 in D<sub>2</sub>O (D).

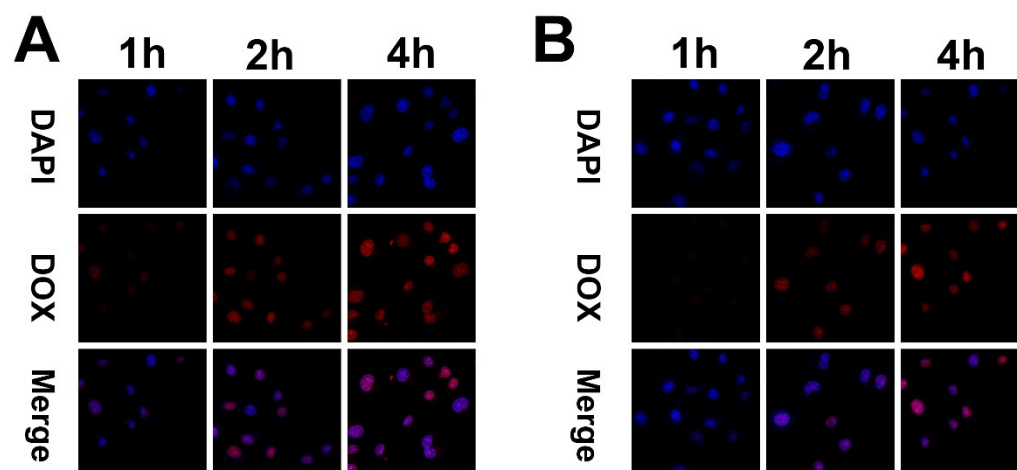

Fig.S2 CLSM images of COS-7 cells after incubation with free DOX+DSF (A) and Co-NPs-4(B) for 1 h, 2 h and 4 h.
